# Supplementary material for: Missed opportunities in full immunization coverage: findings from low- and lower-middle-income countries
Source: PubMed Central journal article supplement (PMC4856841; doi:10.3402/gha.v9.30963), 2016-05-03
Supplement: GHA-9-30963-s001.pdf [file GHA-9-30963-s001.pdf]

**Web-appendix 1. Data sources used in the analyses, showing stratification variables available in each survey**

| Country              | Survey year | Source | ANC               | SBA | VitA | PNC | HVC | ITN |
|----------------------|-------------|--------|-------------------|-----|------|-----|-----|-----|
| 1. Cameroon          | 2011        | DHS    | ✓                 | ✓   | ✓    | ✓   | ✓   | ✓   |
| 2. CAR               | 2010        | MICS   | ✓                 | ✓   | ✓    | ✗   | ✓   | ✓   |
| 3. Chad              | 2004        | DHS    | ✓                 | ✓   | ✓    | ✓   | ✓   | ✗   |
| 4. Côte d'Ivoire     | 2011        | DHS    | ✓                 | ✓   | ✓    | ✓   | ✓   | ✓   |
| 5. DR Congo          | 2010        | MICS   | ✓                 | ✓   | ✓    | ✗   | ✓   | ✓   |
| 6. Ethiopia          | 2011        | DHS    | ✓                 | ✓   | ✓    | ✓   | ✓   | ✗   |
| 7. Guinea            | 2005        | DHS    | ✓                 | ✓   | ✓    | ✓   | ✓   | ✓   |
| 8. Haiti             | 2012        | DHS    | ✓                 | ✓   | ✓    | ✓   | ✓   | ✓   |
| 9. Liberia           | 2007        | DHS    | ✓                 | ✓   | ✓    | ✓   | ✓   | ✗   |
| 10. Mauritania       | 2007        | MICS   | *                 | ✓   | ✓    | ✗   | ✓   | ✗   |
| 11. Nigeria          | 2011        | MICS   | ✓                 | ✓   | ✓    | ✗   | ✓   | ✓   |
| 12. Somalia          | 2006        | MICS   | ✓                 | ✓   | ✓    | ✗   | ✓   | ✗   |
| 13. Timor-Leste      | 2009        | DHS    | ✓                 | ✓   | ✓    | ✓   | ✓   | ✓   |
| 14. Uganda           | 2011        | DHS    | ✓                 | ✓   | ✓    | ✓   | ✓   | ✓   |
| 15. Afghanistan      |             |        | No data available |     |      |     |     |     |
| 16. South Sudan      |             |        |                   |     |      |     |     |     |
| 17. Papua New Guinea |             |        |                   |     |      |     |     |     |

\* Information on ANC limited to having at least one visit during pregnancy.

## Web-appendix 2. Coverage of full immunization and coverage of individual vaccines according to country

| Country       | UN region                 | Source | Survey year | Sample | Full immunization coverage |                  |                | Individual vaccine coverage |                |                    |                  |
|---------------|---------------------------|--------|-------------|--------|----------------------------|------------------|----------------|-----------------------------|----------------|--------------------|------------------|
|               |                           |        |             |        | Fully immunized (N)        | Unweighted FIC % | Weighted FIC % | Weighted DPT %              | Weighted BCG % | Weighted Measles % | Weighted Polio % |
| Timor-Leste   | East Asia & Pacific       | DHS    | 2009        | 1805   | 988                        | 54.8             | 52.6           | 66.4                        | 76.7           | 67.8               | 56.2             |
| Ethiopia      | Eastern & Southern Africa | DHS    | 2011        | 1927   | 565                        | 29.3             | 24.6           | 37.0                        | 66.3           | 55.7               | 45.1             |
| Somalia       | Eastern & Southern Africa | MICS   | 2006        | 1096   | 113                        | 10.3             | 11.6           | 14.1                        | 29.7           | 28.8               | 37.5             |
| Uganda        | Eastern & Southern Africa | DHS    | 2011        | 1427   | 769                        | 53.9             | 52.5           | 72.2                        | 93.7           | 75.8               | 63.9             |
| Haiti         | Latin America & Caribbean | DHS    | 2012        | 1370   | 640                        | 46.7             | 45.8           | 62.8                        | 82.7           | 65.1               | 59.6             |
| Cameroon      | West & Central Africa     | DHS    | 2011        | 2286   | 1241                       | 54.3             | 53.6           | 68.8                        | 87.1           | 70.6               | 70.5             |
| CAR           | West & Central Africa     | MICS   | 2010        | 2015   | 324                        | 16.1             | 17.3           | 32.6                        | 73.6           | 55.6               | 45.1             |
| Chad          | West & Central Africa     | DHS    | 2004        | 901    | 145                        | 16.1             | 11.4           | 20.4                        | 40.2           | 22.8               | 35.6             |
| Cote d'Ivoire | West & Central Africa     | DHS    | 2011        | 1417   | 716                        | 50.5             | 50.5           | 63.8                        | 83.4           | 64.5               | 69.2             |
| DR Congo      | West & Central Africa     | MICS   | 2010        | 2318   | 1122                       | 48.4             | 49.8           | 62.6                        | 85.5           | 72.2               | 59.9             |
| Guinea        | West & Central Africa     | DHS    | 2005        | 1115   | 430                        | 38.6             | 37.4           | 51.4                        | 79.4           | 50.2               | 50.7             |
| Liberia       | West & Central Africa     | DHS    | 2007        | 996    | 352                        | 35.3             | 39.1           | 50.5                        | 77.1           | 63.0               | 49.6             |
| Mauritania    | West & Central Africa     | MICS   | 2007        | 1677   | 651                        | 38.8             | 35.3           | 55.5                        | 84.8           | 74.4               | 45.4             |
| Nigeria       | West & Central Africa     | MICS   | 2011        | 4755   | 1458                       | 30.7             | 33.2           | 44.8                        | 62.2           | 55.6               | 48.6             |

**Web-appendix 3. Coverage (%) and prevalence ratio of full immunization according to health interventions for 14 selected countries**

**Cameroon, 2011**

| Intervention | Level | N    | DPT % | BCG % | Measles % | Polio % | Full immunization coverage |            |                  |           |        |
|--------------|-------|------|-------|-------|-----------|---------|----------------------------|------------|------------------|-----------|--------|
|              |       |      |       |       |           |         | FIC %                      | 95%CI      | Prevalence ratio | 95%CI     | p      |
| ANC          | 0     | 264  | 32.4  | 54.1  | 38.7      | 47.5    | 24.2                       | 16.9, 31.4 | 1.0              | -         | <0.001 |
|              | 1-3   | 531  | 62.2  | 87.6  | 64.7      | 68.8    | 47.5                       | 42.1, 52.9 | 2.0              | 1.4, 2.7  |        |
|              | >3    | 1359 | 79.4  | 94.4  | 79.6      | 76.5    | 62.7                       | 59.3, 66.0 | 2.6              | 1.9, 3.5  |        |
| SBA          | No    | 703  | 45.0  | 69.5  | 49.5      | 59.4    | 32.5                       | 27.3, 37.7 | 1.0              | -         | <0.001 |
|              | Yes   | 1467 | 80.6  | 95.8  | 80.8      | 75.9    | 64.2                       | 60.9, 67.4 | 2.0              | 1.7, 2.3  |        |
| VITA         | No    | 948  | 64.1  | 84.2  | 63.5      | 64.4    | 47.9                       | 43.4, 52.3 | 1.0              | -         | 0.001  |
|              | Yes   | 1338 | 72.0  | 89.0  | 75.4      | 74.7    | 57.6                       | 53.4, 61.8 | 1.2              | 1.1, 1.3  |        |
| PNC          | No    | 1292 | 61.1  | 82.1  | 64.7      | 66.8    | 46.7                       | 42.4, 51.0 | 1.0              | -         | <0.001 |
|              | Yes   | 870  | 79.8  | 94.1  | 78.5      | 75.7    | 63.6                       | 59.8, 67.3 | 1.4              | 1.2, 1.5  |        |
| HVC          | No    | 352  | 16.5  | 43.0  | 30.7      | 39.1    | 8.4                        | 5.3, 11.5  | 1.0              | -         | <0.001 |
|              | Yes   | 1927 | 79.5  | 96.2  | 78.8      | 77.1    | 62.9                       | 59.8, 65.9 | 7.5              | 5.2, 10.8 |        |
| ITN          | No    | 1965 | 67.2  | 86.4  | 69.2      | 69.2    | 51.9                       | 48.3, 55.4 | 1.0              | -         | <0.001 |
|              | Yes   | 321  | 79.8  | 91.5  | 80.1      | 79.3    | 65.5                       | 59.0, 72.0 | 1.3              | 1.1, 1.4  |        |

Central African Republic, 2010

| Intervention | Level | N                 | DPT % | BCG % | Measles % | Polio % | Full immunization coverage |            |                  |           | p      |
|--------------|-------|-------------------|-------|-------|-----------|---------|----------------------------|------------|------------------|-----------|--------|
|              |       |                   |       |       |           |         | FIC %                      | 95%CI      | Prevalence ratio | 95%CI     |        |
| ANC          | 0     | 409               | 14.0  | 47.1  | 35.0      | 38.6    | 7.5                        | 3.8, 11.2  | 1.0              | -         | <0.001 |
|              | 1-3   | 702               | 29.1  | 74.8  | 53.5      | 40.9    | 14.3                       | 10.7, 17.8 | 1.9              | 1.2, 3.2  |        |
|              | >3    | 728               | 43.7  | 86.0  | 66.5      | 52.8    | 23.5                       | 17.9, 29.0 | 3.1              | 1.8, 5.5  |        |
| SBA          | No    | 936               | 21.9  | 63.8  | 48.0      | 39.2    | 11.7                       | 8.5, 14.9  | 1.0              | -         | <0.001 |
|              | Yes   | 1042              | 42.0  | 82.3  | 61.6      | 50.5    | 21.9                       | 17.5, 26.2 | 1.9              | 1.3, 2.6  |        |
| VITA         | No    | 413               | 18.0  | 49.6  | 29.8      | 35.9    | 7.3                        | 3.9, 10.7  | 1.0              | -         | <0.001 |
|              | Yes   | 1602              | 36.7  | 80.5  | 63.0      | 47.7    | 20.1                       | 16.6, 23.6 | 2.8              | 1.7, 4.5  |        |
| PNC          | No    | No data available |       |       |           |         |                            |            |                  |           |        |
|              | Yes   |                   |       |       |           |         |                            |            |                  |           |        |
| HVC          | No    | 389               | 4.3   | 38.2  | 31.3      | 31.4    | 1.8                        | 0.1, 3.5   | 1.0              | -         | <0.001 |
|              | Yes   | 1626              | 39.1  | 81.8  | 61.2      | 48.2    | 20.8                       | 17.5, 24.1 | 11.6             | 4.5, 30.1 |        |
| ITN          | No    | 1271              | 33.8  | 75.5  | 56.7      | 45.4    | 17.9                       | 14.4, 21.3 | 1.0              | -         | 0.493  |
|              | Yes   | 744               | 30.6  | 70.6  | 54        | 44.6    | 16.3                       | 12.4, 20.3 | 0.9              | 0.7, 1.2  |        |

Coverage (%) and prevalence ratio of full immunization according to health interventions for 14 selected countries

Chad, 2014

| Intervention | Level | N                 | DPT % | BCG % | Measles % | Polio % | Full immunization coverage |            |                  |           |        |
|--------------|-------|-------------------|-------|-------|-----------|---------|----------------------------|------------|------------------|-----------|--------|
|              |       |                   |       |       |           |         | FIC %                      | 95%CI      | Prevalence ratio | 95%CI     | p      |
| ANC          | 0     | 390               | 6.2   | 19.0  | 11.3      | 23.2    | 2.7                        | 1.0, 4.5   | 1.0              | -         | <0.001 |
|              | 1-3   | 246               | 33.7  | 61.4  | 37.7      | 45.5    | 23.0                       | 15.9, 30.0 | 8.5              | 4.5, 15.8 |        |
|              | >3    | 236               | 41.0  | 71.0  | 35.1      | 55.6    | 20.5                       | 12.6, 28.4 | 7.5              | 3.6, 15.7 |        |
| SBA          | No    | 635               | 16.3  | 34.4  | 19.5      | 33.1    | 9.5                        | 6.2, 12.8  | 1.0              | -         | 0.002  |
|              | Yes   | 242               | 40.8  | 69.5  | 40.3      | 47.0    | 21.1                       | 13.8, 28.4 | 2.2              | 1.4, 3.5  |        |
| VITA         | No    | 497               | 17.0  | 35.3  | 17.5      | 33.0    | 9.5                        | 6.1, 12.8  | 1.0              | -         | 0.017  |
|              | Yes   | 404               | 27.0  | 49.8  | 33.2      | 40.7    | 15.3                       | 10.3, 20.2 | 1.6              | 1.1, 2.3  |        |
| PNC          | No    | 774               | 18.4  | 37.2  | 20.8      | 34.2    | 10.3                       | 7.0, 13.6  | 1.0              | -         | 0.020  |
|              | Yes   | 102               | 39.6  | 69.7  | 45.2      | 48.0    | 22.8                       | 12.7, 32.9 | 2.2              | 1.3, 3.7  |        |
| HVC          | No    | 450               | 7.4   | 15.5  | 6.8       | 26.0    | 1.7                        | 0.3, 3.1   | 1.0              | -         | <0.001 |
|              | Yes   | 448               | 40.7  | 78.8  | 47.9      | 50.2    | 26.7                       | 19.8, 33.5 | 16.1             | 6.6, 39.1 |        |
| ITN          | No    | No data available |       |       |           |         |                            |            |                  |           |        |
|              | Yes   |                   |       |       |           |         |                            |            |                  |           |        |

Cote D'Ivoire, 2011

| Intervention | Level | N    | DPT % | BCG % | Measles % | Polio % | Full immunization coverage |            |                  |           |        |
|--------------|-------|------|-------|-------|-----------|---------|----------------------------|------------|------------------|-----------|--------|
|              |       |      |       |       |           |         | FIC %                      | 95%CI      | Prevalence ratio | 95%CI     | p      |
| ANC          | 0     | 104  | 13.9  | 27.2  | 29.3      | 35.7    | 8.9                        | 3.1, 14.7  | 1.0              | -         | <0.001 |
|              | 1-3   | 654  | 59.4  | 83.0  | 56.9      | 67.3    | 45.1                       | 39.4, 50.8 | 5.1              | 2.7, 9.6  |        |
|              | >3    | 612  | 76.8  | 92.6  | 78.2      | 77.3    | 63.3                       | 57.9, 68.6 | 7.1              | 3.8, 13.5 |        |
| SBA          | No    | 545  | 44.9  | 68.7  | 48.6      | 58.8    | 33.1                       | 27.6, 38.6 | 1.0              | -         | <0.001 |
|              | Yes   | 831  | 75.5  | 92.3  | 74.1      | 75.8    | 61.1                       | 56.3, 66.0 | 1.8              | 1.6, 2.2  |        |
| VITA         | No    | 473  | 46.5  | 70.8  | 45.9      | 54.5    | 32.7                       | 26.6, 38.8 | 1.0              | -         | <0.001 |
|              | Yes   | 944  | 73.3  | 90.2  | 74.6      | 77.3    | 60.3                       | 55.5, 65.1 | 1.8              | 1.5, 2.2  |        |
| PNC          | No    | 356  | 47.1  | 70.2  | 51.0      | 59.3    | 35.8                       | 28.8, 42.8 | 1.0              | -         | <0.001 |
|              | Yes   | 1011 | 70.5  | 88.4  | 69.7      | 73.1    | 56.3                       | 51.1, 61.4 | 1.6              | 1.3, 1.9  |        |
| HVC          | No    | 97   | 7.1   | 17.7  | 22.1      | 30.5    | 1.2                        | 0.0, 3.5   |                  |           |        |
|              | Yes   | 1319 | 68.4  | 88.6  | 67.9      | 72.3    | 54.5                       | 50.1, 58.8 |                  | NA (1)    |        |
| ITN          | No    | 800  | 63.1  | 84.1  | 66.1      | 68.3    | 50.8                       | 45.3, 56.3 | 1.0              | -         | 0.861  |
|              | Yes   | 617  | 64.8  | 82.3  | 62.2      | 70.5    | 50.2                       | 45.0, 55.4 | 1.0              | 0.9, 1.1  |        |

NA (1) Insufficient sample size in one of the categories

Coverage (%) and prevalence ratio of full immunization according to health interventions for 14 selected countries

Democratic Republic of the Congo, 2010

| Intervention | Level | N                 | DPT % | BCG % | Measles % | Polio % | Full immunization coverage |            |                  |           |        |
|--------------|-------|-------------------|-------|-------|-----------|---------|----------------------------|------------|------------------|-----------|--------|
|              |       |                   |       |       |           |         | FIC %                      | 95%CI      | Prevalence ratio | 95%CI     | p      |
| ANC          | 0     | 260               | 30.9  | 53.0  | 42.8      | 36.9    | 26.6                       | 18.4, 34.8 | 1.0              | -         | <0.001 |
|              | 1-3   | 935               | 64.0  | 87.7  | 71.8      | 61.8    | 52.3                       | 46.9, 57.8 | 2.0              | 1.5, 2.7  |        |
|              | >3    | 982               | 68.8  | 91.6  | 78.7      | 64.2    | 53.2                       | 47.7, 58.7 | 2.0              | 1.5, 2.7  |        |
| SBA          | No    | 596               | 47.6  | 69.8  | 59.6      | 51.7    | 40.3                       | 33.3, 47.4 | 1.0              | -         | <0.001 |
|              | Yes   | 1691              | 68.6  | 92.0  | 77.3      | 63.3    | 53.7                       | 49.2, 58.2 | 1.3              | 1.1, 1.6  |        |
| VITA         | No    | 438               | 26.6  | 51.9  | 29.4      | 24.3    | 15.9                       | 11.2, 20.6 | 1.0              | -         | <0.001 |
|              | Yes   | 1880              | 69.9  | 92.2  | 80.8      | 67.0    | 56.6                       | 52.5, 60.8 | 3.6              | 2.7, 4.8  |        |
| PNC          | No    | No data available |       |       |           |         |                            |            |                  |           |        |
| HVC          | Yes   | No data available |       |       |           |         |                            |            |                  |           |        |
|              | No    | 580               | 14.4  | 45.5  | 34.0      | 19.6    | 9.3                        | 5.0, 13.6  | 1.0              | -         | <0.001 |
| ITN          | Yes   | 1738              | 77.1  | 97.5  | 83.7      | 72.0    | 62.0                       | 58.1, 66.0 | 6.7              | 4.2, 10.6 |        |
|              | No    | 1347              | 57.4  | 83.2  | 69.0      | 56.6    | 44.6                       | 40.1, 49.2 | 1.0              | -         | <0.001 |
| ITN          | Yes   | 971               | 70.2  | 88.9  | 76.9      | 64.7    | 57.4                       | 52.2, 62.6 | 1.3              | 1.2, 1.4  |        |

Ethiopia, 2011

| Intervention | Level | N                 | DPT % | BCG % | Measles % | Polio % | Full immunization coverage |            |                  |           | p      |
|--------------|-------|-------------------|-------|-------|-----------|---------|----------------------------|------------|------------------|-----------|--------|
|              |       |                   |       |       |           |         | FIC %                      | 95%CI      | Prevalence ratio | 95%CI     |        |
| ANC          | 0     | 991               | 24.3  | 53.1  | 42.7      | 33.7    | 14.8                       | 11.0, 18.5 | 1.0              | -         | <0.001 |
|              | 1-3   | 456               | 48.8  | 79.9  | 70.5      | 55.5    | 33.4                       | 27.2, 39.7 | 2.3              | 1.7, 3.0  |        |
|              | >3    | 398               | 60.4  | 88.2  | 79.5      | 65.2    | 42.1                       | 34.6, 49.6 | 2.9              | 2.1, 3.8  |        |
| SBA          | No    | 1546              | 33.4  | 63.4  | 53.2      | 42.6    | 21.1                       | 17.5, 24.7 | 1.0              | -         | <0.001 |
|              | Yes   | 305               | 62.6  | 86.7  | 79.8      | 61.9    | 48.0                       | 38.8, 57.3 | 2.3              | 1.8, 2.9  |        |
| VITA         | No    | 820               | 22.9  | 53.9  | 40.5      | 31.8    | 14.4                       | 10.5, 18.3 | 1.0              | -         | <0.001 |
|              | Yes   | 1107              | 48.7  | 76.6  | 68.3      | 56.1    | 32.9                       | 28.3, 37.6 | 2.3              | 1.8, 3.0  |        |
| PNC          | No    | 1657              | 34.8  | 64.6  | 54.4      | 43.6    | 22.4                       | 18.8, 26.0 | 1.0              | -         | <0.001 |
|              | Yes   | 191               | 68.6  | 89.9  | 85.4      | 64.8    | 53.3                       | 41.1, 65.6 | 2.4              | 1.8, 3.1  |        |
| HVC          | No    | 726               | 9.8   | 37.8  | 31.8      | 23.0    | 5.2                        | 2.3, 8.0   | 1.0              | -         | <0.001 |
|              | Yes   | 1197              | 55.8  | 85.9  | 72.1      | 60.3    | 37.9                       | 33.3, 42.5 | 7.3              | 4.2, 12.7 |        |
| ITN          | No    | No data available |       |       |           |         |                            |            |                  |           |        |
|              | Yes   |                   |       |       |           |         |                            |            |                  |           |        |



## Coverage (%) and prevalence ratio of full immunization according to health interventions for 14 selected countries

### Guinea, 2005

NA 1 Insufficient sample size in one of the categories

| Intervention | Level | N    | DPT % | BCG % | Measles % | Polio % | Full immunization coverage |            |                  |           | p      |
|--------------|-------|------|-------|-------|-----------|---------|----------------------------|------------|------------------|-----------|--------|
|              |       |      |       |       |           |         | FIC %                      | 95%CI      | Prevalence ratio | 95%CI     |        |
| ANC          | 0     | 173  | 9.5   | 27.4  | 10.0      | 13.2    | 5.1                        | 1.4, 8.9   | 1.0              | -         | <0.001 |
|              | 1-3   | 315  | 50.2  | 80.7  | 49.9      | 50.1    | 37.6                       | 31.1, 44.1 | 7.3              | 3.5, 15.3 |        |
|              | >3    | 555  | 64.6  | 93.4  | 63.4      | 62.3    | 47.2                       | 41.9, 52.5 | 9.2              | 4.5, 18.8 |        |
| SBA          | No    | 750  | 43.4  | 71.9  | 45.3      | 45.1    | 32.8                       | 27.9, 37.8 | 1.0              | -         | <0.001 |
|              | Yes   | 339  | 68.4  | 95.5  | 62.6      | 62.7    | 48.4                       | 41.4, 55.4 | 1.5              | 1.2, 1.8  |        |
| VITA         | No    | 331  | 31.2  | 57.8  | 25.6      | 30.5    | 17.5                       | 12.4, 22.6 | 1.0              | -         | <0.001 |
|              | Yes   | 784  | 59.6  | 88.2  | 60.1      | 58.8    | 45.4                       | 40.4, 50.4 | 2.6              | 2.0, 3.4  |        |
| PNC          | No    | 872  | 47.8  | 75.7  | 46.0      | 47.5    | 34.3                       | 29.6, 39.0 | 1.0              | -         | <0.001 |
|              | Yes   | 211  | 63.9  | 93.1  | 68.3      | 62.2    | 49.9                       | 42.7, 57.1 | 1.5              | 1.2, 1.7  |        |
| HVC          | No    | 250  | 9.0   | 33.6  | 11.9      | 15.1    | 4.2                        | 1.7, 6.6   | 1.0              | -         | <0.001 |
|              | Yes   | 864  | 64.0  | 93.1  | 61.6      | 61.3    | 47.2                       | 42.8, 51.7 | 11.3             | 6.3, 20.2 |        |
| ITN          | No    | 1105 | 51.2  | 79.3  | 50.2      | 50.7    | 37.5                       | 33.0, 42.0 |                  |           |        |
|              | Yes   | 10   | 70.8  | 100.0 | 55.5      | 54.0    | 29.8                       | 0.0, 70.2  |                  |           | NA (1) |

NA (1) Insufficient sample size in one of the categories

Haiti, 2012

| Intervention | Level | N    | DPT % | BCG % | Measles % | Polio % | Full immunization coverage |            |                  |           |        |
|--------------|-------|------|-------|-------|-----------|---------|----------------------------|------------|------------------|-----------|--------|
|              |       |      |       |       |           |         | FIC %                      | 95%CI      | Prevalence ratio | 95%CI     | p      |
| ANC          | 0     | 124  | 34.2  | 54.9  | 47.0      | 30.6    | 21.9                       | 13.5, 30.4 | 1.0              | -         | <0.001 |
|              | 1-3   | 306  | 52.6  | 79.3  | 56.0      | 52.5    | 37.6                       | 30.0, 45.1 | 1.7              | 1.2, 2.5  |        |
|              | >3    | 870  | 70.7  | 88.4  | 71.1      | 66.5    | 51.7                       | 47.5, 55.9 | 2.4              | 1.6, 3.4  |        |
| SBA          | No    | 827  | 57.1  | 77.5  | 65.0      | 55.4    | 42.2                       | 37.0, 47.4 | 1.0              | -         | 0.024  |
|              | Yes   | 475  | 72.3  | 92.0  | 65.6      | 66.8    | 51.1                       | 45.3, 56.8 | 1.2              | 1.0, 1.4  |        |
| VITA         | No    | 503  | 42.1  | 73.1  | 37.8      | 39.1    | 23.5                       | 18.7, 28.4 | 1.0              | -         | <0.001 |
|              | Yes   | 867  | 75.7  | 88.8  | 82.3      | 72.5    | 59.7                       | 55.5, 63.9 | 2.5              | 2.1, 3.1  |        |
| PNC          | No    | 923  | 59.5  | 79.3  | 64.5      | 58.1    | 44.0                       | 39.3, 48.8 | 1.0              | -         | 0.220  |
|              | Yes   | 374  | 70.6  | 91.9  | 66.8      | 63.2    | 48.8                       | 42.5, 55.1 | 1.1              | 0.9, 1.3  |        |
| HVC          | No    | 149  | 13.8  | 45.0  | 30.8      | 11.4    | 9.2                        | 3.3, 15.0  | 1.0              | -         | <0.001 |
|              | Yes   | 1219 | 69.1  | 87.7  | 69.6      | 65.8    | 50.5                       | 46.7, 54.3 | 5.5              | 2.9, 10.3 |        |
| ITN          | No    | 1156 | 61.1  | 81.1  | 63.7      | 58.1    | 43.4                       | 39.1, 47.6 | 1.0              | -         | 0.002  |
|              | Yes   | 214  | 72.1  | 91.9  | 73.1      | 67.8    | 59.0                       | 50.7, 67.3 | 1.4              | 1.1, 1.6  |        |

Coverage (%) and prevalence ratio of full immunization according to health interventions for 14 selected countries

Liberia, 2007

| Intervention | Level | N                 | DPT % | BCG % | Measles % | Polio % | Full immunization coverage |            |                  |           | p      |
|--------------|-------|-------------------|-------|-------|-----------|---------|----------------------------|------------|------------------|-----------|--------|
|              |       |                   |       |       |           |         | FIC %                      | 95%CI      | Prevalence ratio | 95%CI     |        |
| ANC          | 0     | 36                | 10.1  | 41.2  | 30.3      | 11.1    | 9.3                        | 0.0, 22.6  | 1.0              | -         | <0.001 |
|              | 1-3   | 199               | 26.4  | 52.6  | 39.2      | 33.2    | 22.6                       | 13.9, 31.3 | 2.4              | 0.6, 9.3  |        |
|              | >3    | 604               | 58.7  | 86.4  | 72.0      | 55.1    | 44.9                       | 39.6, 50.2 | 4.8              | 1.3, 18.4 |        |
| SBA          | No    | 478               | 37.6  | 63.9  | 51.3      | 40.0    | 28.8                       | 21.9, 35.7 | 1.0              | -         | <0.001 |
|              | Yes   | 475               | 63.7  | 91.2  | 74.6      | 59.2    | 49.3                       | 43.5, 55.0 | 1.7              | 1.3, 2.2  |        |
| VITA         | No    | 483               | 40.5  | 68.2  | 51.5      | 40.0    | 29.9                       | 23.3, 36.6 | 1.0              | -         | <0.001 |
|              | Yes   | 513               | 61.2  | 86.6  | 75.4      | 59.9    | 49.0                       | 42.2, 55.7 | 1.6              | 1.3, 2.1  |        |
| PNC          | No    | 372               | 33.9  | 61.4  | 48.4      | 36.0    | 25.7                       | 18.7, 32.7 | 1.0              | -         | <0.001 |
|              | Yes   | 574               | 60.7  | 87.3  | 71.7      | 57.9    | 47.0                       | 41.5, 52.6 | 1.8              | 1.4, 2.4  |        |
| HVC          | No    | 239               | 7.9   | 25.2  | 25.8      | 13.9    | 3.4                        | 0.5, 6.3   | 1.0              | -         | <0.001 |
|              | Yes   | 754               | 62.9  | 92.2  | 73.9      | 60.0    | 49.5                       | 44.6, 54.3 | 14.6             | 6.3, 34.0 |        |
| ITN          | No    | No data available |       |       |           |         |                            |            |                  |           |        |
|              | Yes   |                   |       |       |           |         |                            |            |                  |           |        |

Mauritania, 2007

| Intervention | Level | N                 | DPT % | BCG % | Measles % | Polio % | Full immunization coverage |            |                  |           | p      |
|--------------|-------|-------------------|-------|-------|-----------|---------|----------------------------|------------|------------------|-----------|--------|
|              |       |                   |       |       |           |         | FIC %                      | 95%CI      | Prevalence ratio | 95%CI     |        |
| ANC          | 0     | 480               | 50.2  | 75.9  | 67.3      | 45.9    | 37.2                       | 32.0, 42.4 | 1.0              | -         | 0.459  |
|              | 1+    | 1128              | 58.9  | 89.3  | 77.9      | 45.3    | 35.1                       | 31.4, 38.7 | 0.9              | 0.8, 1.1  |        |
| SBA          | No    | 733               | 53.9  | 79.2  | 70.3      | 49.1    | 39.5                       | 35.1, 43.9 | 1.0              | -         | 0.016  |
|              | Yes   | 875               | 58.2  | 90.2  | 78.2      | 42.6    | 32.6                       | 28.5, 36.7 | 0.8              | 0.7, 1.0  |        |
| VITA         | No    | 671               | 46.7  | 81.8  | 68.5      | 38.5    | 27.4                       | 23.4, 31.5 | 1.0              | -         | <0.001 |
|              | Yes   | 1006              | 62.5  | 87.2  | 79.0      | 50.7    | 41.5                       | 37.7, 45.4 | 1.5              | 1.3, 1.8  |        |
| PNC          | No    | No data available |       |       |           |         |                            |            |                  |           |        |
|              | Yes   | No data available |       |       |           |         |                            |            |                  |           |        |
| HVC          | No    | 222               | 20.1  | 44.3  | 35.1      | 10.7    | 4.5                        | 1.8, 7.2   | 1.0              | -         | <0.001 |
|              | Yes   | 1455              | 61.4  | 91.5  | 80.9      | 51.1    | 40.4                       | 36.8, 44.0 | 9.0              | 4.9, 16.5 |        |
| ITN          | No    | No data available |       |       |           |         |                            |            |                  |           |        |
|              | Yes   | No data available |       |       |           |         |                            |            |                  |           |        |

**Coverage (%) and prevalence ratio of full immunization according to health interventions for 14 selected countries**

**Nigeria, 2007**

| Intervention | Level | N                 | DPT % | BCG % | Measles % | Polio % | Full immunization coverage |            |                  |            | p      |
|--------------|-------|-------------------|-------|-------|-----------|---------|----------------------------|------------|------------------|------------|--------|
|              |       |                   |       |       |           |         | FIC %                      | 95% CI     | Prevalence ratio | 95%CI      |        |
| ANC          | 0     | 1427              | 10.3  | 23.6  | 21.0      | 27.2    | 7.0                        | 5.0, 8.9   | 1.0              | -          | <0.001 |
|              | 1-3   | 483               | 39.8  | 59.3  | 54.8      | 48.7    | 29.6                       | 24.1, 35.1 | 4.3              | 3.1, 5.9   |        |
|              | >3    | 2303              | 64.5  | 83.3  | 73.6      | 61.3    | 49.1                       | 45.5, 52.7 | 7.1              | 5.3, 9.4   |        |
| SBA          | No    | 2733              | 22.9  | 40.0  | 35.4      | 37.1    | 16.7                       | 14.5, 18.8 | 1.0              | -          | <0.001 |
|              | Yes   | 1923              | 69.6  | 87.4  | 78.6      | 62.0    | 52.3                       | 48.7, 56.0 | 3.1              | 2.7, 3.6   |        |
| VITA         | No    | 1755              | 22.9  | 35.5  | 29.8      | 31.4    | 17.3                       | 14.1, 20.5 | 1.0              | -          | <0.001 |
|              | Yes   | 3000              | 56.9  | 76.9  | 69.9      | 58.1    | 42.0                       | 38.9, 45.1 | 2.4              | 2.0, 2.9   |        |
| PNC          | No    | No data available |       |       |           |         |                            |            |                  |            |        |
| HVC          | Yes   | No data available |       |       |           |         |                            |            |                  |            |        |
|              | No    | 2184              | 6.4   | 21.7  | 20.7      | 25.5    | 3.1                        | 2.1, 4.0   | 1.0              | -          | <0.001 |
| ITN          | Yes   | 2571              | 73.6  | 92.4  | 81.8      | 65.9    | 55.8                       | 52.8, 58.7 | 18.3             | 13.2, 25.3 |        |
|              | No    | 3869              | 44.4  | 61.1  | 54.4      | 48.1    | 32.8                       | 29.9, 35.7 | 1.0              | -          | 0.454  |
| ITN          | Yes   | 886               | 46.9  | 67.0  | 61.2      | 51.1    | 35.0                       | 29.9, 40.0 | 1.1              | 0.9, 1.3   |        |

**Somalia, 2006**

NA 1 Insufficient sample size in one of the categories

| Intervention | Level | N                 | DPT % | BCG % | Measles % | Polio % | Full immunization coverage |            |                  |            | p      |
|--------------|-------|-------------------|-------|-------|-----------|---------|----------------------------|------------|------------------|------------|--------|
|              |       |                   |       |       |           |         | FIC %                      | 95%CI      | Prevalence ratio | 95%CI      |        |
| ANC          | 0     | 646               | 9.4   | 21.1  | 22.7      | 31.4    | 8.4                        | 5.5, 11.4  | 1.0              | -          | <0.001 |
|              | 1-3   | 272               | 24.3  | 47.5  | 41.7      | 51.1    | 19.7                       | 13.4, 26.0 | 2.3              | 1.6, 3.5   |        |
|              | >3    | 12                | 42.4  | 66.1  | 58.2      | 41.6    | 31.1                       | 0.0, 66.9  | NA (1)           | NA (1)     |        |
| SBA          | No    | 690               | 9.2   | 22.1  | 23.2      | 30.1    | 7.5                        | 4.8, 10.3  | 1.0              | -          | <0.001 |
|              | Yes   | 367               | 24.3  | 44.9  | 41.1      | 52.5    | 20.9                       | 14.9, 26.8 | 2.8              | 1.9, 4.0   |        |
| VITA         | No    | 855               | 11.2  | 25.1  | 24.2      | 34.1    | 9.2                        | 6.3, 12.1  | 1.0              | -          | 0.002  |
|              | Yes   | 241               | 23.6  | 45.2  | 44.2      | 49.0    | 19.7                       | 12.8, 26.6 | 2.1              | 1.4, 3.1   |        |
| PNC          | No    | No data available |       |       |           |         |                            |            |                  |            |        |
|              | Yes   |                   |       |       |           |         |                            |            |                  |            |        |
| HVC          | No    | 802               | 2.5   | 11.6  | 15.2      | 27.3    | 1.3                        | 0.5, 2.1   | 1.0              | -          | <0.001 |
|              | Yes   | 294               | 43.8  | 76.3  | 63.7      | 63.8    | 38.1                       | 30.2, 46.0 | 29.3             | 15.7, 54.6 |        |
| ITN          | No    | No data available |       |       |           |         |                            |            |                  |            |        |
|              | Yes   |                   |       |       |           |         |                            |            |                  |            |        |

NA (1) Insufficient sample size in one of the categories

Coverage (%) and prevalence ratio of full immunization according to health interventions for 14 selected countries

Uganda, 2011

| Intervention | Level | N    | DPT % | BCG % | Measles % | Polio % | Full immunization coverage |            |                  |          |        |
|--------------|-------|------|-------|-------|-----------|---------|----------------------------|------------|------------------|----------|--------|
|              |       |      |       |       |           |         | FIC %                      | 95%CI      | Prevalence ratio | 95%CI    | p      |
| ANC          | 0     | 43   | 41.6  | 68.7  | 50.8      | 42.9    | 33.3                       | 12.2, 54.3 | 1.0              | -        | 0.029  |
|              | 1-3   | 594  | 69.6  | 94.3  | 73.4      | 63.0    | 50.7                       | 45.9, 55.5 | 1.5              | 0.8, 2.8 |        |
|              | >3    | 665  | 77.1  | 95.6  | 79.7      | 67.7    | 57.2                       | 52.2, 62.2 | 1.7              | 0.9, 3.1 |        |
| SBA          | No    | 514  | 67.6  | 90.4  | 72.0      | 61.0    | 50.2                       | 45.0, 55.5 | 1.0              | -        | 0.139  |
|              | Yes   | 811  | 75.2  | 96.1  | 78.2      | 66.5    | 54.9                       | 50.5, 59.4 | 1.1              | 1.0, 1.2 |        |
| VITA         | No    | 508  | 57.6  | 87.1  | 61.1      | 49.4    | 35.0                       | 30.2, 39.7 | 1.0              | -        | <0.001 |
|              | Yes   | 919  | 80.5  | 97.4  | 84.0      | 72.1    | 62.4                       | 58.3, 66.6 | 1.8              | 1.5, 2.1 |        |
| PNC          | No    | 848  | 68.8  | 92.0  | 73.0      | 62.4    | 50.0                       | 45.5, 54.4 | 1.0              | -        | 0.011  |
|              | Yes   | 470  | 78.6  | 97.2  | 81.0      | 67.8    | 58.6                       | 53.1, 64.1 | 1.2              | 1.0, 1.3 |        |
| HVC          | No    | 170  | 42.4  | 71.1  | 50.5      | 20.3    | 10.6                       | 4.7, 16.5  | 1.0              | -        | <0.001 |
|              | Yes   | 1256 | 76.0  | 96.6  | 79.0      | 69.5    | 57.8                       | 54.2, 61.5 | 5.5              | 3.2, 9.5 |        |
| ITN          | No    | 739  | 65.9  | 92.0  | 72.1      | 57.9    | 47.1                       | 42.7, 51.5 | 1.0              | -        | <0.001 |
|              | Yes   | 688  | 78.9  | 95.5  | 79.6      | 70.2    | 58.3                       | 53.3, 63.2 | 1.2              | 1.1, 1.4 |        |

Timor-Leste, 2009

| Intervention | Level | N    | DPT % | BCG % | Measles % | Polio % | Full immunization coverage |            |                  |          |        |
|--------------|-------|------|-------|-------|-----------|---------|----------------------------|------------|------------------|----------|--------|
|              |       |      |       |       |           |         | FIC %                      | 95%CI      | Prevalence ratio | 95%CI    | p      |
| ANC          | 0     | 200  | 23.2  | 33.1  | 25.9      | 23.6    | 20.1                       | 13.8, 26.5 | 1.0              | -        | <0.001 |
|              | 1-3   | 511  | 65.8  | 79.3  | 68.1      | 56.3    | 52.5                       | 47.1, 57.9 | 2.6              | 1.9, 3.6 |        |
|              | >3    | 953  | 76.2  | 85.1  | 76.6      | 63.6    | 60.0                       | 55.6, 64.4 | 3.0              | 2.2, 4.1 |        |
| SBA          | No    | 1185 | 60.9  | 70.9  | 62.2      | 52.8    | 48.8                       | 44.7, 52.9 | 1.0              | -        | <0.001 |
|              | Yes   | 490  | 79.0  | 90.3  | 80.3      | 64.5    | 61.5                       | 55.8, 67.3 | 1.3              | 1.1, 1.4 |        |
| VITA         | No    | 757  | 49.1  | 58.8  | 48.0      | 39.6    | 34.9                       | 30.3, 39.5 | 1.0              | -        | <0.001 |
|              | Yes   | 1046 | 81.3  | 92.1  | 84.7      | 70.4    | 67.7                       | 63.6, 71.8 | 1.9              | 1.7, 2.2 |        |
| PNC          | No    | 1315 | 62.2  | 72.1  | 63.7      | 53.8    | 50.0                       | 46.0, 54.0 | 1.0              | -        | <0.001 |
|              | Yes   | 355  | 81.1  | 93.8  | 81.8      | 65.7    | 62.5                       | 56.1, 68.9 | 1.3              | 1.1, 1.4 |        |
| HVC          | No    | 542  | 27.5  | 37.9  | 32.7      | 14.7    | 13.5                       | 9.9, 17.1  | 1.0              | -        | <0.001 |
|              | Yes   | 1261 | 84.5  | 94.7  | 84.1      | 75.4    | 70.7                       | 67.0, 74.4 | 5.2              | 4.0, 6.8 |        |
| ITN          | No    | 1010 | 58.2  | 69.3  | 60.1      | 50.1    | 46.3                       | 42.1, 50.4 | 1.0              | -        | <0.001 |
|              | Yes   | 793  | 77.1  | 86.4  | 77.8      | 64.0    | 60.8                       | 55.7, 65.8 | 1.3              | 1.2, 1.5 |        |
